# Supplementary material
Source: PubMed Central journal article supplement (PMC3052859)

## Supplemental figure legends

**Supplemental figure S1.** Serum cytokine concentrations. Transplantation was performed as in Fig. 1. At day 14-21 after transplantation, serum was taken when recipients were sacrificed. Shown is the combined result of at least three independent experiments. In total, 12-13 recipients of wild type CD4<sup>+</sup> T cells and 10 recipients of IL-21R<sup>-/-</sup> CD4<sup>+</sup> T cells were analyzed.

**Supplemental figure S2.** Transplantation was performed as in Fig. 1. At days 14 and 21 after transplantation, splenocytes ( $5 \times 10^5$ ) were stimulated with anti-CD3/CD28 antibodies for 18 hours. Concentrations of TGF- $\beta$  and IL-10 in the supernatants were determined by ELISA.

**Supplemental figure S3.** Foxp3<sup>+</sup>CD4<sup>+</sup> T cells in pre-transplantation mice. Splenocytes from either wild type or IL-21R<sup>-/-</sup> mice were stained with anti-CD4 and anti-Foxp3 antibodies (upper panels). The lower panels indicate staining with anti-CD4 and isotype control antibodies.

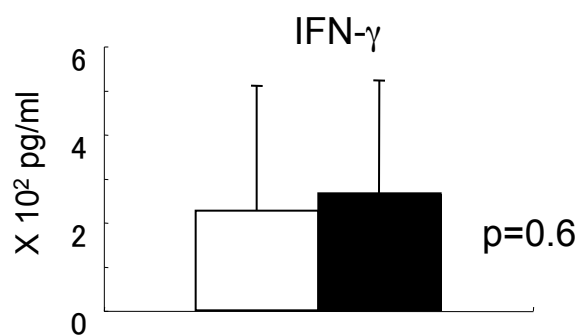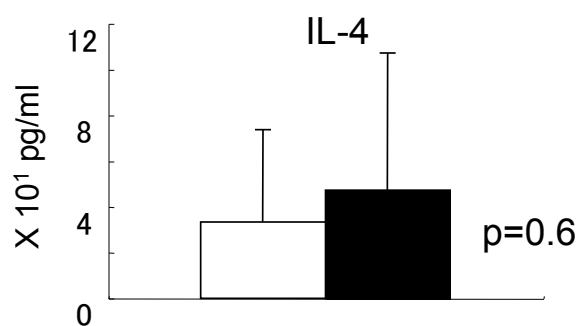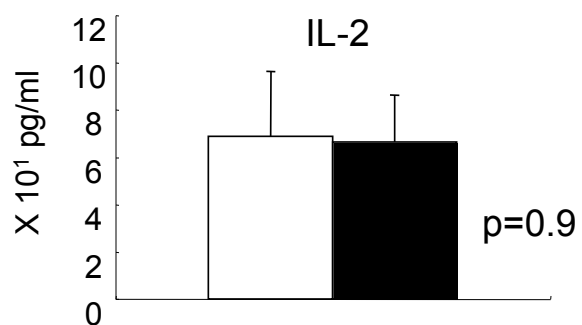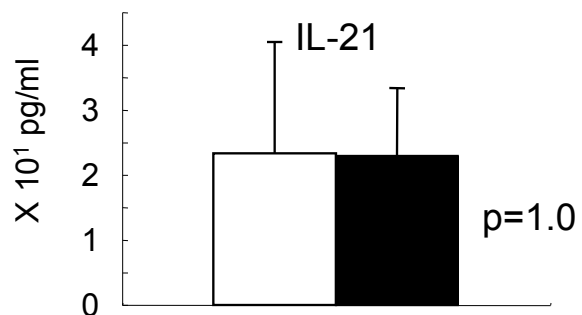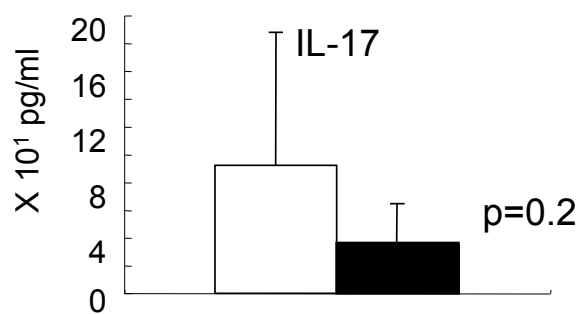

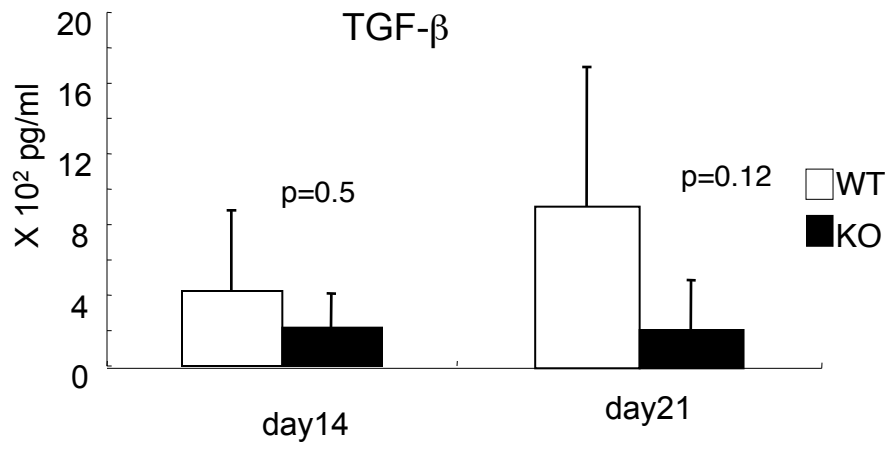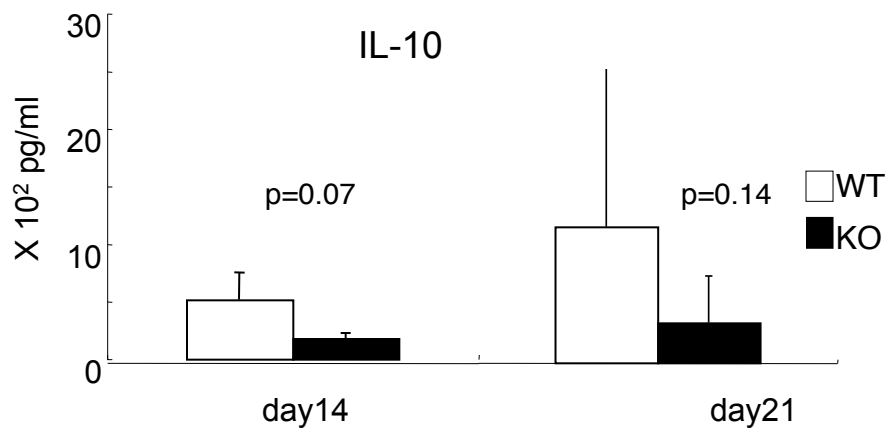

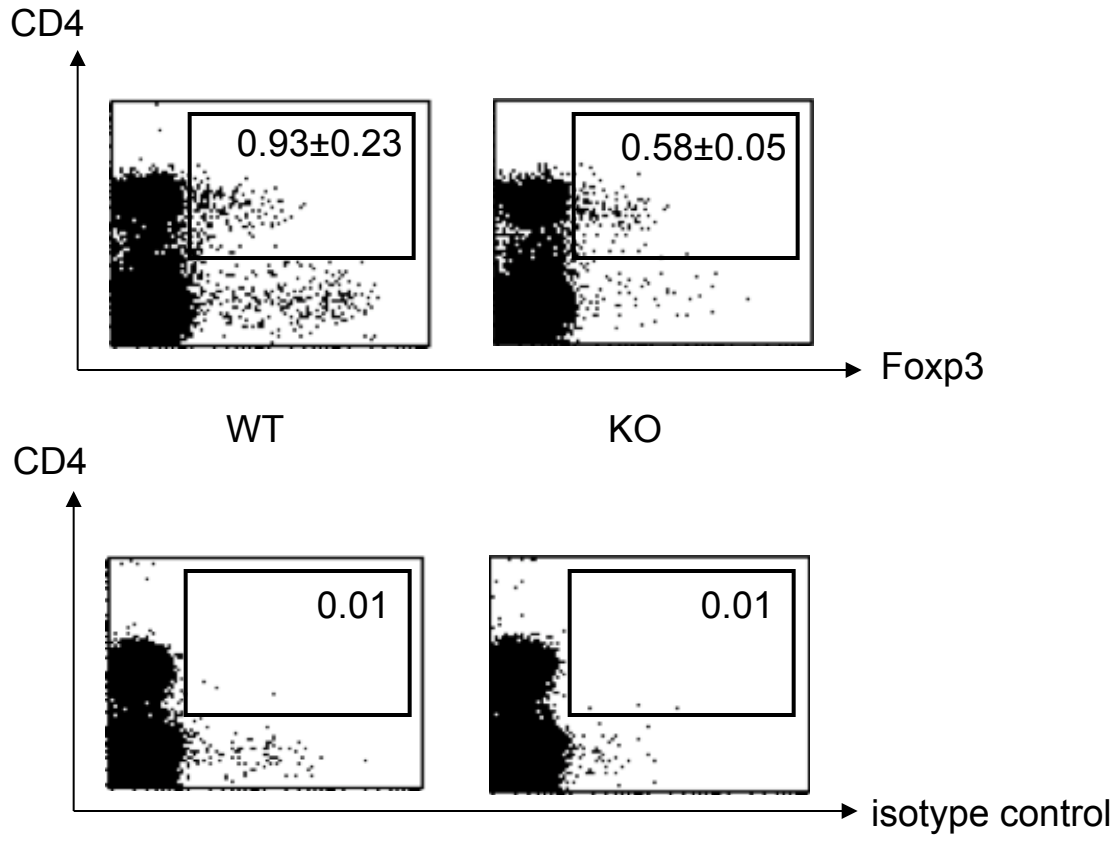

Supplement: NIHMS277264-supplement-Supplemental_legends_and_figures.pdf [file NIHMS277264-supplement-Supplemental_legends_and_figures.pdf]
